# Supplementary material for: Porous hybrid aerogels with ultrahigh sulfur loading for lithium–sulfur batteries
Source: Royal Society of Chemistry journal article supplement (doi:10.1039/c8ta01750f), 2018-01-01
Supplement: c8ta01750f1.pdf [file c8ta01750f1.pdf]

## Supplementary Information

### Porous Hybrid Aerogels with Ultrahigh Sulfur

### Loading for Lithium-Sulfur Batteries

Yibo He,<sup>ab</sup> Songyan Bai,<sup>a</sup> Zhi Chang,<sup>ab</sup> Qi Li,<sup>a</sup> Yu Qiao<sup>ab</sup> and Haoshen

Zhou<sup>\*abc</sup>

<sup>a</sup> *Energy Technology Research Institute, National Institute of Advanced Industrial Science and Technology (AIST), 1-1-1, Umezono, Tsukuba 305-8568, Japan*

<sup>b</sup> *Graduate School of System and Information Engineering, University of Tsukuba 1-1-1, Tennoudai, Tsukuba 305-8573, Japan*

<sup>c</sup> *National Laboratory of Solid State Microstructures & Department of Energy Science and Engineering, Nanjing University, Nanjing 210093, P. R. China*

*\*E-mail: [hs.zhou@aist.go.jp](mailto:hs.zhou@aist.go.jp) & [hszhou@nju.edu.cn](mailto:hszhou@nju.edu.cn)*

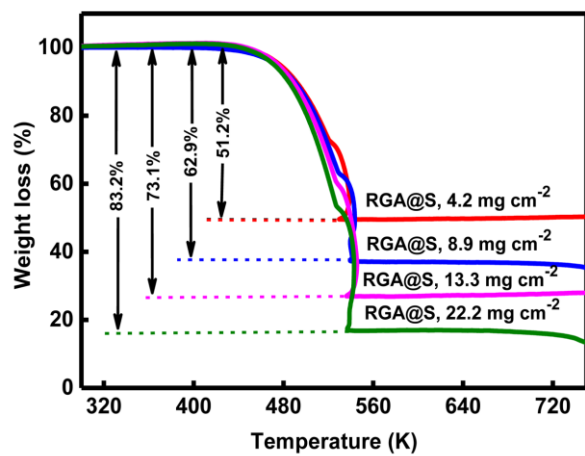

**Fig. S1** TGA curves of RGA@S hybrid aerogels with various sulfur contents.

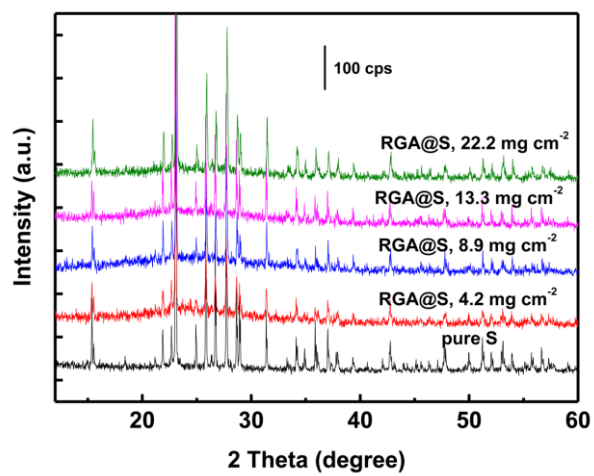

**Fig. S2** X-ray diffraction patterns of RGA@S hybrid aerogels with various sulfur contents.

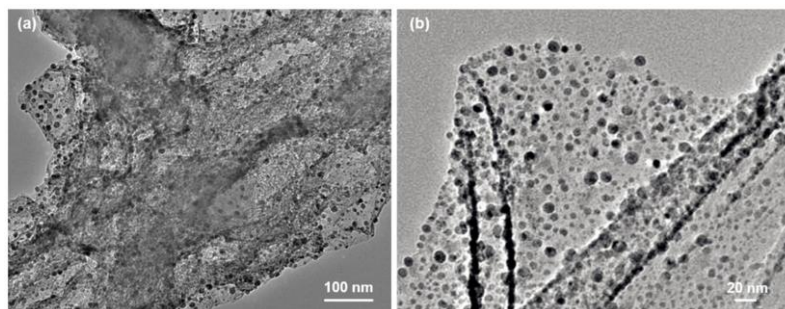

**Fig. S3** TEM images of RGA@S hybrid aerogel with sulfur loading of  $8.9 \text{ mg cm}^{-2}$ .

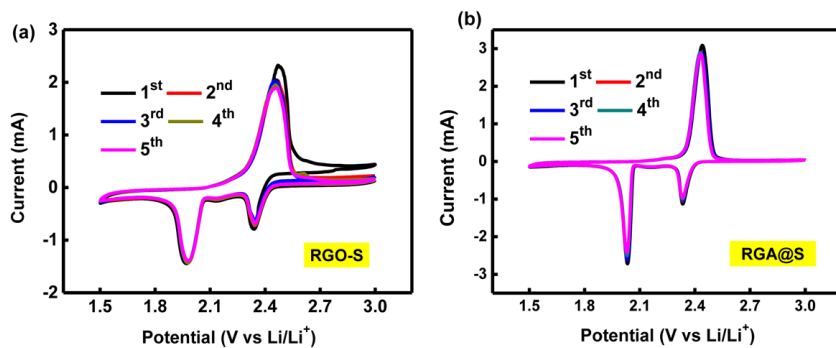

**Fig. S4** Cyclic voltammograms at a scan rate of  $0.1 \text{ mV s}^{-1}$  for (a) RGO-S electrode and (b) RGA@S electrode with sulfur loading of  $4.2 \text{ mg cm}^{-2}$ .

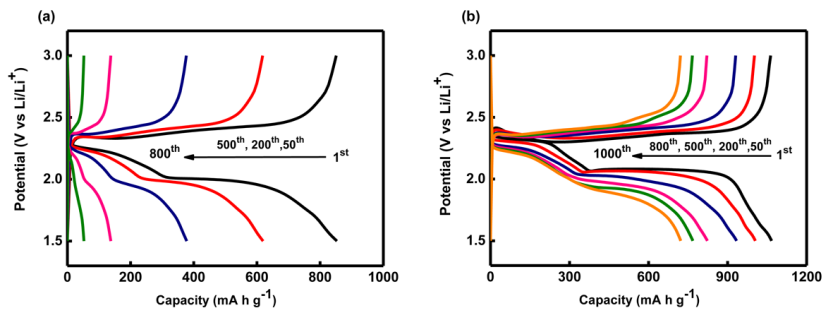

**Fig. S5** Discharge/charge profiles of selected cycles at a current density of  $2 \text{ A g}^{-1}$  for (a) RGO-S and (b) RGA@S electrodes with sulfur loading of  $4.2 \text{ mg cm}^{-2}$ .

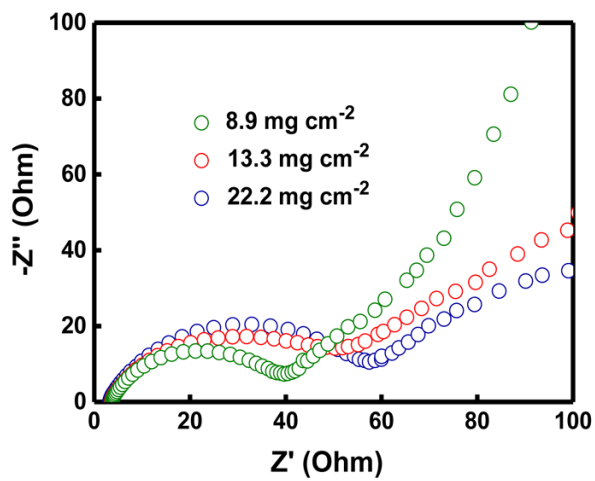

**Fig. S6** Electrochemical impedance spectra of the RGA@S electrodes with different sulfur loading.
